# Supplementary material for: Influence of uranyl complexation on the reaction kinetics of the dodecane radical cation with used nuclear fuel extraction ligands (TBP, DEHBA, and DEHiBA)
Source: Royal Society of Chemistry journal article supplement (doi:10.1039/d1cp03797h), 2021-01-01
Supplement: d1cp03797h1.pdf [file d1cp03797h1.pdf]

## Supplementary Information: Influence of Uranyl Complexation on the Reaction Kinetics of the Dodecane Radical Cation with Used Nuclear Fuel Extraction Ligands (TBP, DEHBA, and DEHiBA)

Cristian Celis-Baros, Corey D. Pilgrim, Andrew R. Cook, Travis S. Grimes, Stephen P. Mezyk, and Gregory P. Horne

### Kinect Figures

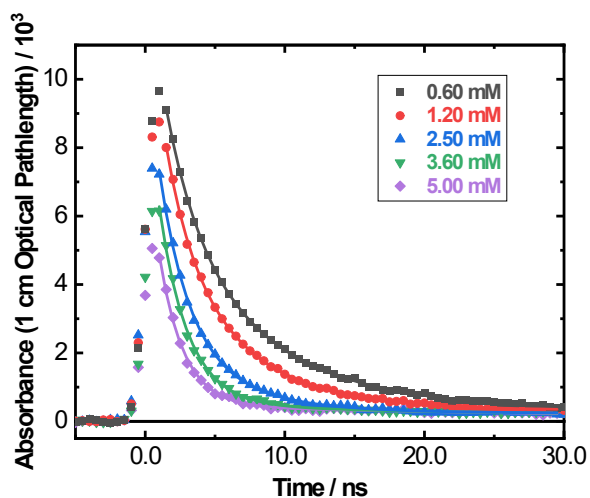

Fig. S1. Double-exponential fitting for  $\text{RH}^{**}$  decays at 800 nm with  $[\text{UO}_2(\text{NO}_3)_2(\text{DEHBA})_2]$  in 0.5 M DCM/*n*-dodecane solution.

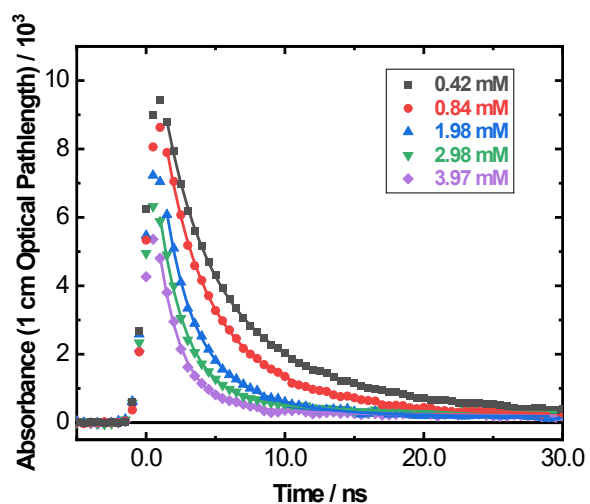

Fig. S2. Double-exponential fitting for  $\text{RH}^{**}$  decays at 800 nm with  $[\text{UO}_2(\text{NO}_3)_2(\text{DEHiBA})_2]$  in 0.5 M DCM/*n*-dodecane solution.

## Computational Figures and Tables

**Table S1.** Electronic structure calculation free energy ( $\Delta G$ ) values for the reaction of  $RH^{**}$  with TBP, DEHBA, and DEH/BA for electron/hole transfer and proton transfer scenarios, without dispersion corrections in the geometries or energies.

| Ligand | $\Delta G_{\text{electron/hole transfer}}$ (eV) | $\Delta G_{\text{proton transfer}}$ (eV) |
|--------|-------------------------------------------------|------------------------------------------|
| TBP    | 0.33                                            | -0.43                                    |
| DEHBA  | -1.03                                           | -0.61                                    |
| DEH/BA | -1.01                                           | -0.61                                    |

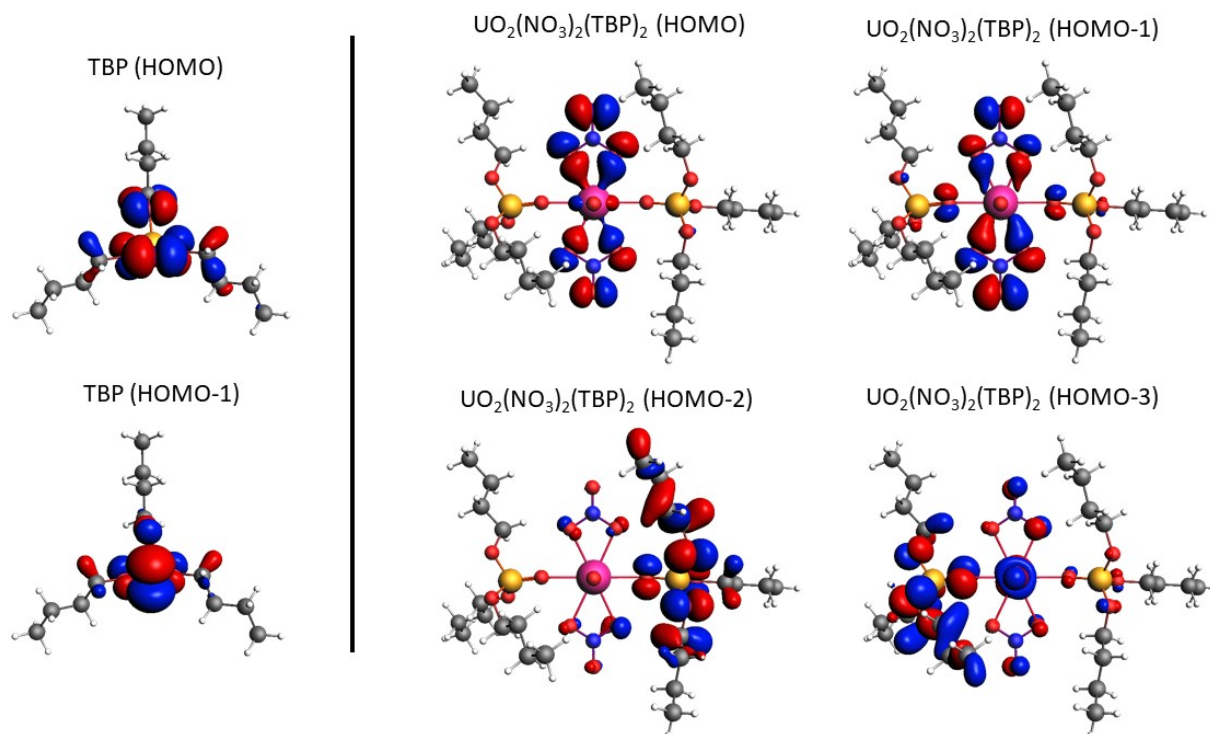**Fig. S3.** Selected molecular orbitals of TBP (left panel) and the complexed uranyl compound (right panel).

Supplementary Information

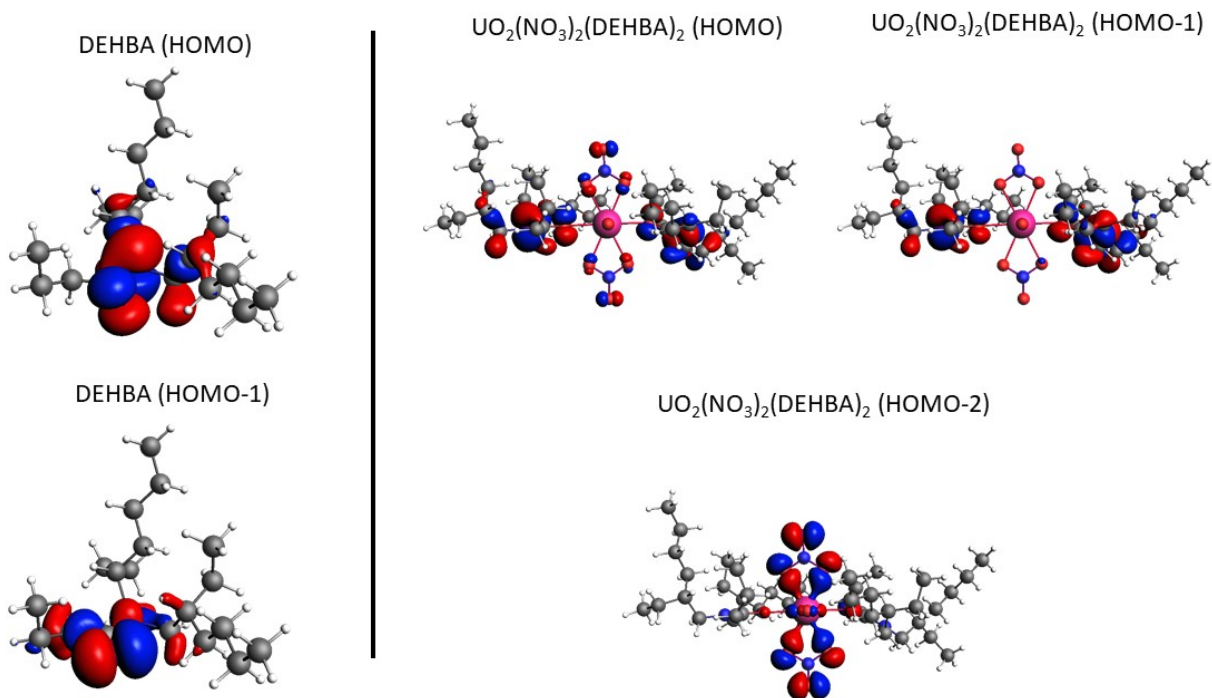

Fig. S4. Selected molecular orbitals of DEHBA (left panel) and the complexed uranyl compound (right panel).

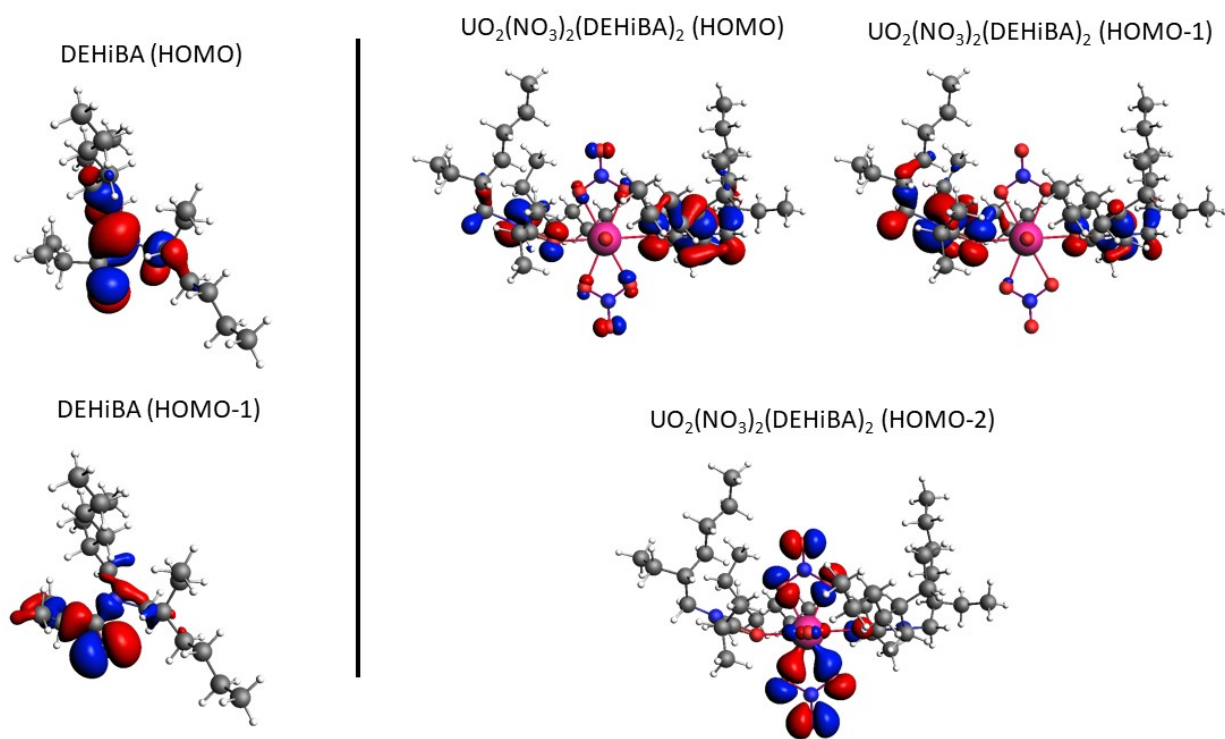

Fig. S5. Selected molecular orbitals of DEHiBA (left panel) and the complexed uranyl compound (right panel).

Supplementary Information

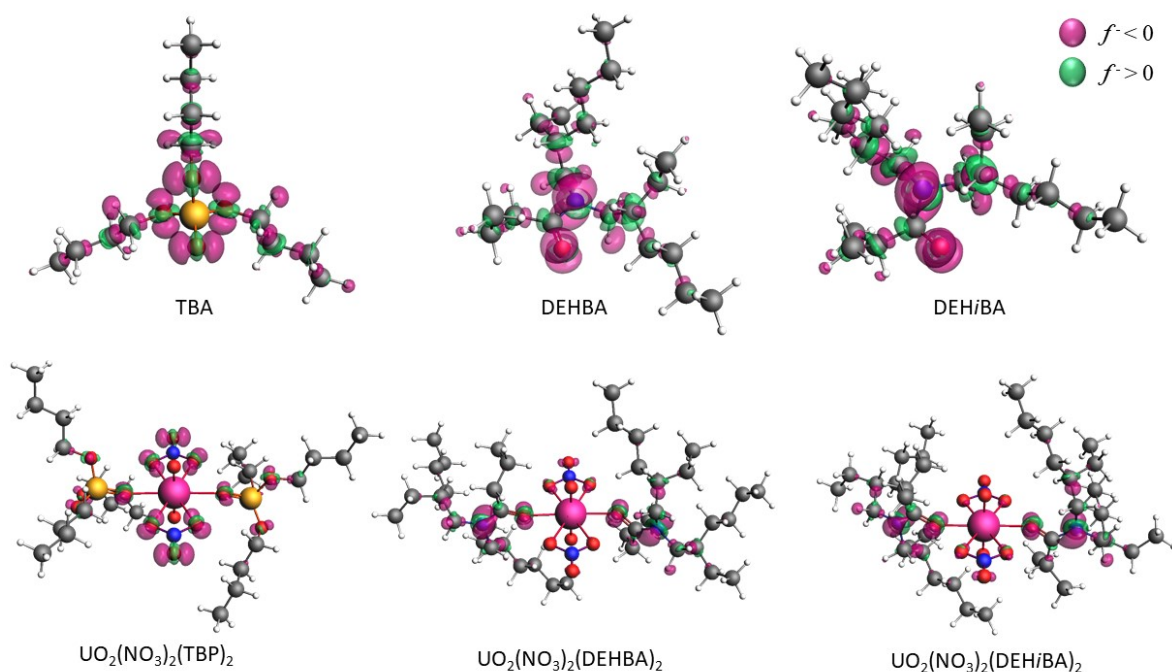

**Fig. S6.** Global electrophilic Fukui function ( $f^-$ ) plots. The violet surfaces correspond to the regions where the Fukui function is negative while green surfaces to positive values. Uranium atoms are depicted in pink, carbon in grey, nitrogen in blue, sulfur in orange, and hydrogen in white.

**Table S2.** Selected bond lengths of the TBP-derived structures. All distances are given in Å.

|                        | TBP   | TBP** | [ $\text{UO}_2(\text{NO}_3)_2(\text{TBP})_2$ ] |       | [ $\text{UO}_2(\text{NO}_3)_2(\text{TBP})_2$ ]** |       |
|------------------------|-------|-------|------------------------------------------------|-------|--------------------------------------------------|-------|
|                        |       |       | TBP1                                           | TBP2  | TBP1                                             | TBP2  |
| P–O <sub>TBP</sub>     | 1.482 | 1.501 | 1.496                                          | 1.500 | 1.522                                            | 1.523 |
| P–OR1 <sub>TBP</sub>   | 1.613 | 1.611 | 1.594                                          | 1.592 | 1.591                                            | 1.590 |
| P–OR2 <sub>TBP</sub>   | 1.619 | 1.604 | 1.592                                          | 1.595 | 1.576                                            | 1.579 |
| P–OR3 <sub>TBP</sub>   | 1.614 | 1.574 | 1.605                                          | 1.607 | 1.578                                            | 1.579 |
| P–OR <sub>avg</sub>    | 1.615 | 1.596 | 1.597                                          | 1.598 | 1.582                                            | 1.583 |
| U–O <sub>TBP</sub>     | -     | -     | 2.456                                          | 2.495 | 2.435                                            | 2.361 |
| U–O1 <sub>YL</sub>     | -     | -     |                                                | 1.800 |                                                  | 1.791 |
| U–O2 <sub>YL</sub>     | -     | -     |                                                | 1.795 |                                                  | 1.786 |
| U–O1 <sub>NO3(a)</sub> | -     | -     |                                                | 2.536 |                                                  | 2.601 |
| U–O2 <sub>NO3(a)</sub> | -     | -     |                                                | 2.524 |                                                  | 2.595 |
| U–O1 <sub>NO3(b)</sub> | -     | -     |                                                | 2.544 |                                                  | 2.695 |
| U–O2 <sub>NO3(b)</sub> | -     | -     |                                                | 2.521 |                                                  | 2.687 |

Supplementary Information

**Table S3.** Selected bond lengths of DEHBA-derived structures. All distances are given in Å.

|                        | DEHBA | DEHBA** | [UO <sub>2</sub> (NO <sub>3</sub> ) <sub>2</sub> (DEHBA) <sub>2</sub> ] |        | [UO <sub>2</sub> (NO <sub>3</sub> ) <sub>2</sub> (DEHBA) <sub>2</sub> ]** |        |
|------------------------|-------|---------|-------------------------------------------------------------------------|--------|---------------------------------------------------------------------------|--------|
|                        |       |         | DEHBA1                                                                  | DEHBA2 | DEHBA1                                                                    | DEHBA2 |
| C=O                    | 1.234 | 1.217   | 1.261                                                                   | 1.268  | 1.262                                                                     | 1.261  |
| N–C                    | 1.383 | 1.468   | 1.359                                                                   | 1.355  | 1.376                                                                     | 1.376  |
| C–C <sub>pr</sub>      | 1.532 | 1.510   | 1.516                                                                   | 1.514  | 1.509                                                                     | 1.509  |
| U–O <sub>DEHBA</sub>   | -     | -       | 2.426                                                                   | 2.431  | 2.455                                                                     | 2.452  |
| U–O1 <sub>YL</sub>     | -     | -       |                                                                         | 1.808  |                                                                           | 1.800  |
| U–O2 <sub>YL</sub>     | -     | -       |                                                                         | 1.807  |                                                                           | 1.801  |
| U–O1 <sub>NO3(a)</sub> | -     | -       |                                                                         | 2.533  |                                                                           | 2.529  |
| U–O2 <sub>NO3(a)</sub> | -     | -       |                                                                         | 2.531  |                                                                           | 2.533  |
| U–O1 <sub>NO3(b)</sub> | -     | -       |                                                                         | 2.523  |                                                                           | 2.523  |
| U–O2 <sub>NO3(b)</sub> | -     | -       |                                                                         | 2.524  |                                                                           | 2.525  |

**Table S4.** Selected bond lengths of DEH/BA-derived structures. All distances are given in Å.

|                        | DEH/BA | DEH/BA** | [UO <sub>2</sub> (NO <sub>3</sub> ) <sub>2</sub> (DEH/BA) <sub>2</sub> ] |         | [UO <sub>2</sub> (NO <sub>3</sub> ) <sub>2</sub> (DEH/BA) <sub>2</sub> ]** |         |
|------------------------|--------|----------|--------------------------------------------------------------------------|---------|----------------------------------------------------------------------------|---------|
|                        |        |          | DEH/BA1                                                                  | DEH/BA2 | DEH/BA1                                                                    | DEH/BA2 |
| C=O                    | 1.243  | 1.212    | 1.265                                                                    | 1.269   | 1.258                                                                      | 1.262   |
| N–C                    | 1.385  | 1.493    | 1.356                                                                    | 1.357   | 1.378                                                                      | 1.380   |
| C–C <sub>ipr</sub>     | 1.548  | 1.518    | 1.526                                                                    | 1.533   | 1.518                                                                      | 1.527   |
| U–O <sub>DEH/BA</sub>  | -      | -        | 2.429                                                                    | 2.425   | 2.446                                                                      | 2.448   |
| U–O1 <sub>YL</sub>     | -      | -        |                                                                          | 1.809   |                                                                            | 1.802   |
| U–O2 <sub>YL</sub>     | -      | -        |                                                                          | 1.807   |                                                                            | 1.801   |
| U–O1 <sub>NO3(a)</sub> | -      | -        |                                                                          | 2.511   |                                                                            | 2.514   |
| U–O2 <sub>NO3(a)</sub> | -      | -        |                                                                          | 2.515   |                                                                            | 2.525   |
| U–O1 <sub>NO3(b)</sub> | -      | -        |                                                                          | 2.543   |                                                                            | 2.527   |
| U–O2 <sub>NO3(b)</sub> | -      | -        |                                                                          | 2.549   |                                                                            | 2.527   |

Supplementary Information

**Table S5.** Condensed electrophilic Fukui function and electrophilic softness values of key atoms in TBP and [UO<sub>2</sub>(NO<sub>3</sub>)<sub>2</sub>(TBP)<sub>2</sub>]. L1 and L2 refer to ligands (TBP, O<sub>yl</sub>, or NO<sub>3</sub>).

|                       | $f_k^-$      |                                                                       |              | $s_k^-$      |                                                                       |              |
|-----------------------|--------------|-----------------------------------------------------------------------|--------------|--------------|-----------------------------------------------------------------------|--------------|
|                       | TBP          | [UO <sub>2</sub> (NO <sub>3</sub> ) <sub>2</sub> (TBP) <sub>2</sub> ] |              | TBP          | [UO <sub>2</sub> (NO <sub>3</sub> ) <sub>2</sub> (TBP) <sub>2</sub> ] |              |
|                       |              | L1                                                                    | L2           |              | L1                                                                    | L2           |
| O <sub>P=O</sub>      | <b>0.136</b> | 0.016                                                                 | 0.018        | <b>0.430</b> | 0.131                                                                 | 0.147        |
| O <sub>OBu</sub> (1)  | 0.121        | 0.026                                                                 | 0.014        | 0.383        | 0.212                                                                 | 0.114        |
| O <sub>OBu</sub> (2)  | 0.106        | 0.031                                                                 | 0.029        | 0.335        | 0.253                                                                 | 0.237        |
| O <sub>OBu</sub> (3)  | 0.093        | 0.021                                                                 | 0.025        | 0.294        | 0.171                                                                 | 0.204        |
| P <sub>O=P</sub>      | 0.032        | 0.019                                                                 | 0.020        | 0.101        | 0.155                                                                 | 0.163        |
| O <sub>yl</sub>       | -            | 0.031                                                                 | 0.032        | -            | 0.253                                                                 | 0.261        |
| O <sub>NO3</sub> (1)  | -            | 0.067                                                                 | 0.063        | -            | 0.539                                                                 | 0.506        |
| O <sub>NO3</sub> (2)  | -            | 0.066                                                                 | 0.059        | -            | 0.531                                                                 | 0.482        |
| O <sub>NO3</sub> (3)* | -            | <b>0.106</b>                                                          | <b>0.100</b> | -            | <b>0.857</b>                                                          | <b>0.808</b> |
| N <sub>NO3</sub>      | -            | 0.021                                                                 | 0.019        | -            | 0.171                                                                 | 0.155        |

\* O<sub>NO3</sub> (3) corresponds to the nitrate's non-complexed oxygen atom.

**Table S6.** Condensed electrophilic Fukui function and electrophilic softness values of key atoms in DEHBA and [UO<sub>2</sub>(NO<sub>3</sub>)<sub>2</sub>(DEHBA)<sub>2</sub>]. L1 and L2 refer to ligands (DEHBA, O<sub>yl</sub>, or NO<sub>3</sub>).

|                       | $f_k^-$      |                                                                         |              | $s_k^-$      |                                                                         |              |
|-----------------------|--------------|-------------------------------------------------------------------------|--------------|--------------|-------------------------------------------------------------------------|--------------|
|                       | DEHBA        | [UO <sub>2</sub> (NO <sub>3</sub> ) <sub>2</sub> (DEHBA) <sub>2</sub> ] |              | DEHBA        | [UO <sub>2</sub> (NO <sub>3</sub> ) <sub>2</sub> (DEHBA) <sub>2</sub> ] |              |
|                       |              | L1                                                                      | L2           |              | L1                                                                      | L2           |
| O <sub>C=O</sub>      | <b>0.167</b> | 0.051                                                                   | 0.046        | <b>0.639</b> | 0.490                                                                   | 0.442        |
| C <sub>O=C</sub>      | 0.121        | 0.008                                                                   | 0.008        | 0.383        | 0.077                                                                   | 0.077        |
| N <sub>DEHBA</sub>    | 0.106        | <b>0.068</b>                                                            | <b>0.069</b> | 0.335        | <b>0.653</b>                                                            | <b>0.662</b> |
| C <sub>propyl</sub>   | 0.093        | -0.006                                                                  | -0.006       | 0.294        | -0.058                                                                  | -0.058       |
| O <sub>yl</sub>       | -            | 0.016                                                                   | 0.021        | -            | 0.154                                                                   | 0.202        |
| O <sub>NO3</sub> (1)  | -            | 0.007                                                                   | 0.014        | -            | 0.067                                                                   | 0.134        |
| O <sub>NO3</sub> (2)  | -            | 0.000                                                                   | 0.015        | -            | 0.000                                                                   | 0.144        |
| O <sub>NO3</sub> (3)* | -            | 0.041                                                                   | 0.046        | -            | 0.394                                                                   | 0.442        |
| N <sub>NO3</sub>      | -            | 0.006                                                                   | 0.007        | -            | 0.058                                                                   | 0.067        |

\* O<sub>NO3</sub> (3) corresponds to the nitrate's non-complexed oxygen atom.

Supplementary Information

**Table S7.** Condensed electrophilic Fukui function and electrophilic softness values of key atoms in DEH/BA and  $[\text{UO}_2(\text{NO}_3)_2(\text{DEH/BA})_2]$ . L1 and L2 refer to ligands (DEH/BA,  $\text{O}_{\text{yl}}$ , or  $\text{NO}_3$ ).

|                               | DEH/BA       | $f_k^-$                                       |              | DEH/BA       | $s_k^-$                                       |              |
|-------------------------------|--------------|-----------------------------------------------|--------------|--------------|-----------------------------------------------|--------------|
|                               |              | $\text{UO}_2(\text{DEH/BA})_2(\text{NO}_3)_2$ |              |              | $\text{UO}_2(\text{DEH/BA})_2(\text{NO}_3)_2$ |              |
|                               |              | L1                                            | L2           |              | L1                                            | L2           |
| $\text{O}_{\text{C=O}}$       | <b>0.171</b> | 0.049                                         | 0.048        | 0.658        | 0.482                                         | 0.472        |
| $\text{C}_{\text{O=C}}$       | 0.121        | 0.005                                         | 0.008        | 0.039        | 0.059                                         | 0.079        |
| $\text{N}_{\text{DEH/BA}}$    | 0.106        | <b>0.070</b>                                  | <b>0.066</b> | <b>0.700</b> | <b>0.689</b>                                  | <b>0.649</b> |
| $\text{C}_{\text{propyl}}$    | 0.093        | -0.006                                        | -0.011       | -0.070       | -0.059                                        | -0.108       |
| $\text{O}_{\text{yl}}$        | -            | 0.015                                         | 0.019        | -            | 0.148                                         | 0.187        |
| $\text{O}_{\text{NO}_3}$ (1)  | -            | 0.015                                         | 0.005        | -            | 0.148                                         | 0.049        |
| $\text{O}_{\text{NO}_3}$ (2)  | -            | 0.009                                         | 0.007        | -            | 0.089                                         | 0.069        |
| $\text{O}_{\text{NO}_3}$ (3)* | -            | 0.047                                         | 0.035        | -            | 0.462                                         | 0.344        |
| $\text{N}_{\text{NO}_3}$      | -            | 0.007                                         | 0.007        | -            | 0.069                                         | 0.069        |

\*  $\text{O}_{\text{NO}_3}$  (3) corresponds to the nitrate's non-complexed oxygen atom.

**Table S8.** Composition of natural localized molecular orbitals (NLMOs) in terms of natural hybrid orbitals (NHOs). The selected NLMOs correspond to the most relevant for the chemical bond based on their natural localized bond order (BO) contributions

|                                            | $[\text{UO}_2(\text{NO}_3)_2(\text{TBP})_2]$ |          |                                         | $[\text{UO}_2(\text{NO}_3)_2(\text{DEHBA})_2]$ |          |                                           | $[\text{UO}_2(\text{NO}_3)_2(\text{DEH/BA})_2]$ |          |                                           |
|--------------------------------------------|----------------------------------------------|----------|-----------------------------------------|------------------------------------------------|----------|-------------------------------------------|-------------------------------------------------|----------|-------------------------------------------|
|                                            | BO                                           | Type     | Composition                             | BO                                             | Type     | Composition                               | BO                                              | Type     | Composition                               |
| $^{\text{a}}\text{U}-\text{O}_{\text{yl}}$ | 0.44                                         | $\pi$    | 22% U (38 6d + 62 5f)<br>78% O (2p)     | 0.43                                           | $\pi$    | 22% U (38 6d + 62 5f)<br>78% O (2p)       | 0.43                                            | $\pi$    | 22% U (38 6d + 62 5f)<br>78% O (2p)       |
|                                            | 0.44                                         | $\pi$    | 22% U (39 6d + 61 5f)<br>78% O (2p)     | 0.43                                           | $\pi$    | 22% U (39 6d + 61 5f)<br>78% O (2p)       | 0.43                                            | $\pi$    | 22% U (39 6d + 61 5f)<br>78% O (2p)       |
|                                            | 0.58                                         | $\sigma$ | 29% U (18 6d + 82 5f)<br>70% O (2p)     | 0.57                                           | $\sigma$ | 29% U (18 6d + 82 5f)<br>70% O (2p)       | 0.56                                            | $\sigma$ | 29% U (18 6d + 82 5f)<br>70% O (2p)       |
| $^{\text{a}}\text{U}-\text{O}_{\text{L}}$  | 0.07                                         | $\sigma$ | 4% U (10 7s + 52 6d + 37 5f)<br>96% TBP | 0.15                                           | $\sigma$ | 8% U (11 7s + 55 6d + 34 5f)<br>92% DEHBA | 0.15                                            | $\sigma$ | 8% U (11 7s + 53 6d + 36 5f)<br>92% DEHBA |
|                                            | 0.07                                         | $\sigma$ | 4% U (10 7s + 50 6d + 40 5f)<br>96% TBP | 0.05                                           | $\pi$    | 2% U (5 7s + 37 6d + 58 5f)<br>98% DEHBA  | 0.04                                            | $\pi$    | 2% U (1 7s + 34 6d + 65 5f)<br>98% DEHBA  |

<sup>a</sup> Average values.
